# Supplementary material for: Genome-Wide Identification and Expression Analysis of OsbZIP09 Target Genes in Rice Reveal Its Mechanism of Controlling Seed Germination
Source: PubMed Central journal article supplement (PMC7915905; doi:10.3390/ijms22041661), 2021-02-07
Supplement: ijms-22-01661-s001.pdf [file ijms-22-01661-s001.pdf]

## Supplementary Material

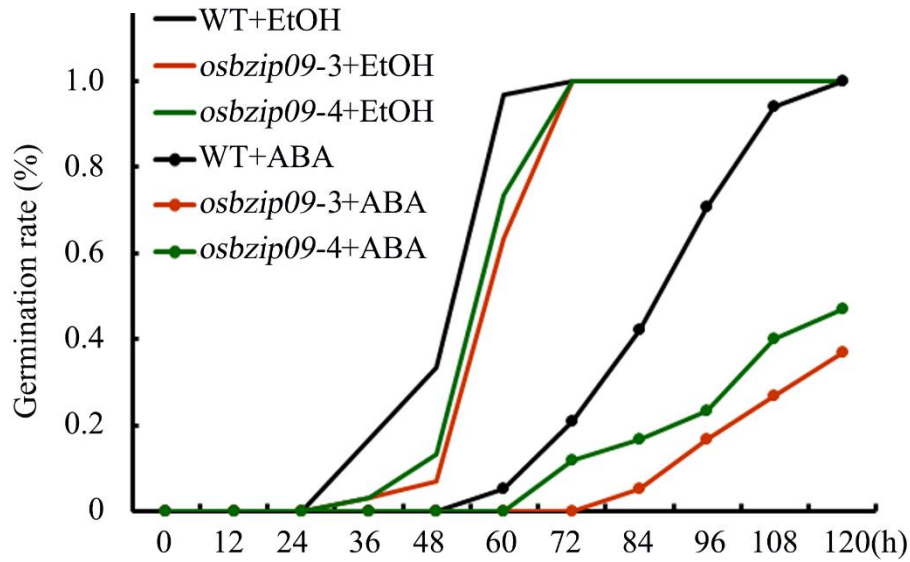

**Figure S1.** Time-course analysis of seed germination of *osbzip09* mutants (*osbzip09-3* and *osbzip09-4*) under normal conditions.

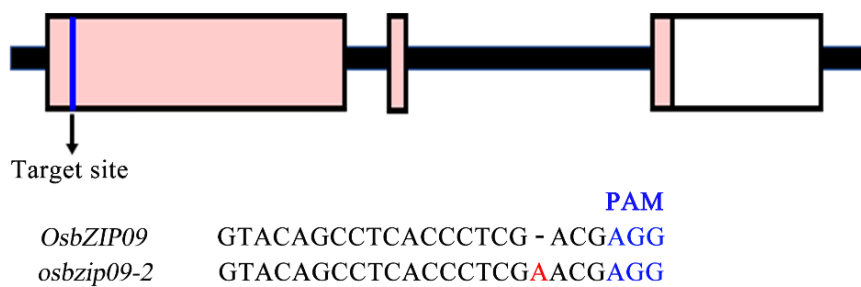

**Figure S2.** Schematic diagram of the CRISPR/Cas9 target site in *Os*bZIP09 and the basis of the mutation in *osbzip09-2*. The protospacer adjacent motif (PAM) is highlighted in blue.

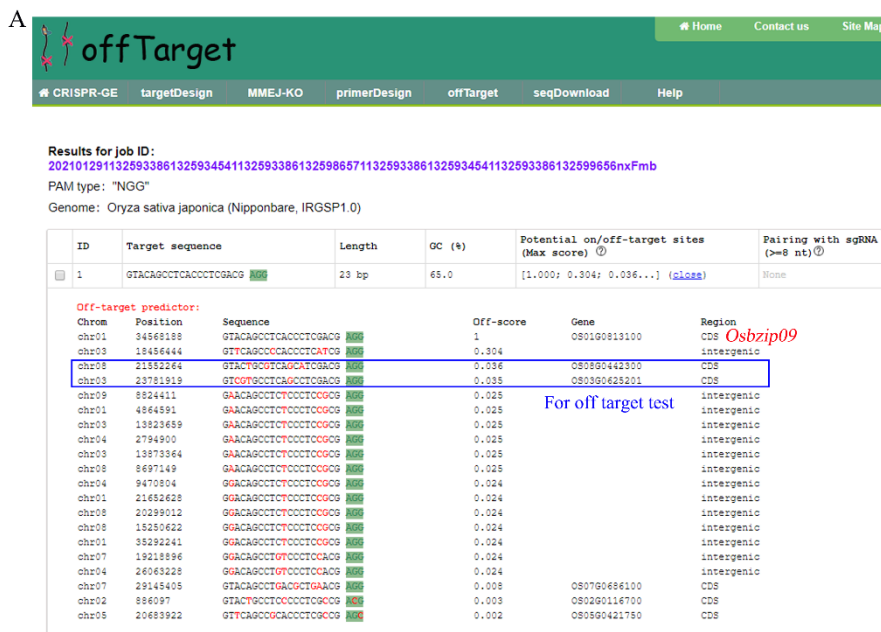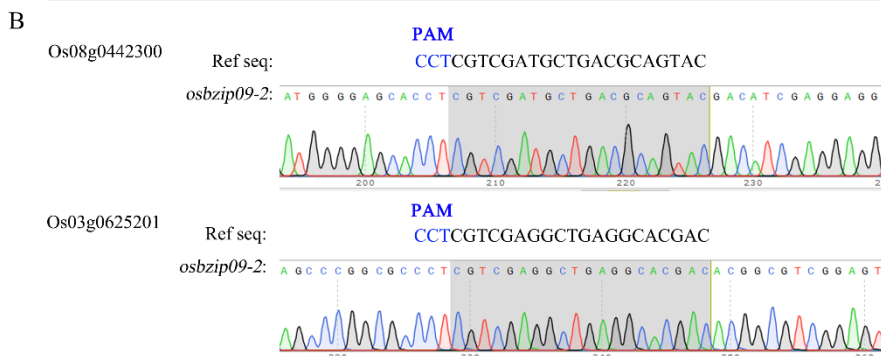

**Figure S3.** Off target analysis of *osbzip09-2* mutant. (A) Off target analysis of *OsZIP09* target sequence for CRISPR/Cas9 mediated gene editing using CRISPR-GE (<http://skl.scau.edu.cn/home/>). (B) Sequencing result of two candidate genes with the highest off-scores indicated that there was no off target mutation in *osbzip09-2* mutant.



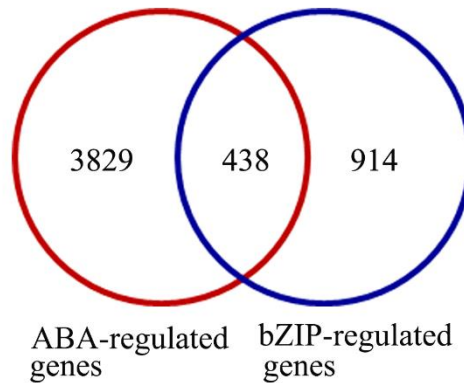

**Figure S6.** Venn diagram showing the overlap between genes responsive to ABA and mutation of *OsZIP09*.

**Table S1** Oligonucleotide primer sequences used in this study

| Primer Names   | Sequence (5' → 3')    | Usage                                                            |
|----------------|-----------------------|------------------------------------------------------------------|
| OsZIP09-SG-seq | GTACAGCCTCACCCCTCGACG | SG sequence for editing <i>OsZIP09</i>                           |
| OsZIP09seq-F   | ATCTCGTCTCGATCATGGGG  | Primers for sequencing and confirming mutation of <i>OsZIP09</i> |
| OsZIP09seq-R   | CCCCAGCTTTGACCAGGAAA  |                                                                  |
| bZIP09qRT-F    | GAGGCATGTCAGGGGATGTG  | For qRT-PCR analysis of <i>OsZIP09</i>                           |
| bZIP09qRT-R    | ACTTGGGTTCTGGTACAGGC  |                                                                  |
| LEA3qRT-F      | TCACTTCAAATTCGGTGCAA  | For qRT-PCR analysis of <i>LEA3</i>                              |
| LEA3qRT-R      | CACACCCGTCAGAAATCCTC  |                                                                  |
| LEA4qRT-F      | CAGCACAGGCTCCATAAGCA  | For qRT-PCR analysis of <i>LEA4</i>                              |
| LEA4qRT-R      | CAGCACAGAGACATGCGT    |                                                                  |
| LEA18qRT-F     | TCCCATCCATGTCCAGGTTGA | For qRT-PCR analysis of <i>LEA18</i>                             |
| LEA18qRT-R     | ACGGCCTCGGATGATGAAGC  |                                                                  |
| LEA25qRT-F     | AGCTGGTGGACTAGGAACCG  | For qRT-PCR analysis of <i>LEA25</i>                             |
| LEA25qRT-R     | ATGGTGTCCGGTGTGTGG    |                                                                  |
| PP2C51RT-F     | TGACGAGTTGGAACGAGTGG  | For qRT-PCR analysis of <i>PP2C51</i>                            |
| PP2C51RT-R     | CTCGCCAGGATCAGGAACTC  |                                                                  |
| USPqRT-F       | GTCCGTGGTGCTGAAGATGT  | For qRT-PCR analysis of <i>USP</i>                               |
| USPqRT-R       | GCGACTACTTTGCCTTGACG  |                                                                  |
| LOX2qRT-F      | AAGAACGCCCTCGACATCAA  | For qRT-PCR analysis of <i>LOX2</i>                              |
| LOX2qRT-R      | CGAACTTGGACTCTCCCGTC  |                                                                  |
| CSLA5qRT-F     | CACCGCCCGGAGAAACAA    | For qRT-PCR analysis of <i>CSLA5</i>                             |

|                     |                                   |                                           |
|---------------------|-----------------------------------|-------------------------------------------|
| CSLA5qRT-R          | CACCACCAGCATCACCGACAT             |                                           |
| Actin1qRT-F         | CCAAGGCCAATCGTGAGAAGA             | Reference gene for qRT-PCR assay          |
| Actin1qRT-R         | AATCAGTGAGATCACGCCAG              |                                           |
| pZIP09-EcoRI-F      | CGGAATTCATGGCGTCTGAAGGCCGGAG      | For construction of <i>OsbZIP09-62-SK</i> |
| pZIP09-KpnI-R       | GGGGTACCTCAGAAATCTGCGGAGCTTG      |                                           |
| proLEA25KpnI-F      | GGGGTACCTCCTTGCTTTTCTCGTTTGA      | For construction of                       |
| proLEA25BamH-R      | CGGGATCCTGTGGTGGGTGAAGCGAGGA      | <i>LEA25pro-pGreenII</i>                  |
| proLOX2KpnI-F       | GGGGTACCAGCACGTTTTTCAACGCCC       | For construction of                       |
| proLOX2NcoI-R       | CATGCCATGGTCTCTCACTAACCAACCAATGCT | <i>LOX2pro-pGreenII</i>                   |
| DAPseq Adapter<br>A | CACGACGCTCTTCCGATCT               | For DAP-seq sampling                      |
| DAPseq Adapter<br>B | GATCGGAAGAGCACACGTCTG             |                                           |

---
